# Supplementary material
Source: HighWire-hosted journal article supplement (https://erj.ersjournals.com/content/50/2/1602419)
Supplement: inline-supplementary-material-1 [file inline-supplementary-material-1.pdf]

## **Prevalence and incidence of interstitial lung diseases in a multi-ethnic Parisian agglomeration**

Boris Duchemann, Isabella Annesi-Maesano, Camille Jacobe de Naurois, Shreosi Sanyal, Pierre-Yves Brillet, Michel Brauner, Marianne Kambouchner, Sophie Huynh, Jean Marc Naccache, Raphael Borie, Jacques Piquet, Arsène Mekinian, Jérôme Virally, Yurdagul Uzunhan, Jacques Cadranel, Bruno Crestani, Olivier Fain, Francois Lhote, Robin Dhote, Nathalie Saidenberg, Paul-André Rosental, Dominique Valeyre, Hilario Nunes

### Online Data Supplement

Table S1: Comparison of demographic characteristics of the population of Seine Saint Denis county and the French general population

Table S2: Codes of the ICDs version 10 used to identify patients with ILD from the SS

Table S3: Age and sex-standardized prevalence rates of the main etiological diagnoses (reviewed cases)

Table S4: Age and sex-standardized prevalence and incidence rates of the main etiological diagnoses (reviewed cases) of individuals with age of 65 and more.

Table S5: Description of prevalent ILD cases for the whole cohort (reviewed and non reviewed)

Table S6: Geographical origin-standardized prevalence and incidence rates of the main etiological diagnoses (reviewed cases)

Figure S1: distribution of prevalent cases the whole cohort (reviewed and non reviewed)

**Table S1: Comparison of demographic characteristics of the population of Seine Saint Denis county and the French general population**

|                                  | Seine Saint Denis | France          |
|----------------------------------|-------------------|-----------------|
| <b>Geographic origin : n (%)</b> |                   |                 |
| - Europeans                      | 1220817 (79.3)    | 62587691 (95.1) |
| - North-Africans                 | 144957 (9.4)      | 1650788 (2.5)   |
| - Afro-Caribbeans                | 94906 (6.2)       | 733151 (1.1)    |
| - Others                         | 78044 (5.1)       | 834836 (1.3)    |
| - Total                          | 1538724           | 65806466        |
| <b>Mean age (years)</b>          | 35.3              | 40.5            |
| <b>Sex-ratio (Men/Women)</b>     | 1.0               | 0,9             |

**Table S2: Codes of the ICDs version 10 used to identify patients with ILD from the SS**

| <b>Codes</b>                                          | <b>Diagnoses</b>                                            | <b>All SS cases* (n=588)</b> | <b>Cases from SS source only (n=339)</b> |
|-------------------------------------------------------|-------------------------------------------------------------|------------------------------|------------------------------------------|
| D86†, 860, 862, 863, 868, 869                         | Sarcoidosis                                                 | 423                          | 208                                      |
| J60†                                                  | Coalworker pneumoconiosis                                   | 0                            | 0                                        |
| J61†                                                  | Pneumoconiosis due to asbestos and other mineral fibres     | 53                           | 49                                       |
| J62†                                                  | Pneumoconiosis due to dust containing silica                | 28                           | 24                                       |
| J628                                                  | Pneumoconiosis due to other dust containing silica          | 3                            | 3                                        |
| J63†, 630,631,633,634,635,638                         | Pneumoconiosis due to other inorganic dusts                 | 2                            | 2                                        |
| J64†                                                  | Unspecified pneumoconiosis                                  | 7                            | 2                                        |
| J67†, 670, 671, 672, 673, 674, 675, 676, 677, 678,679 | Hypersensitivity pneumonitis due to organic dust            | 1                            | 0                                        |
| J70†                                                  | Respiratory conditions due to other external agents         | 1                            | 1                                        |
| J70.1                                                 | Chronic and other pulmonary manifestations due to radiation | 1                            | 1                                        |
| J70.2                                                 | Acute drug-induced interstitial lung disorders              | 0                            | 0                                        |
| J70.3                                                 | Chronic drug-induced interstitial lung disorders            | 0                            | 0                                        |
| J70.4                                                 | Drug-induced interstitial lung disorders, unspecified       | 0                            | 0                                        |
| J82†                                                  | Pulmonary eosinophilia, not elsewhere classified            | 1                            | 0                                        |

|       |                                                                    |    |    |
|-------|--------------------------------------------------------------------|----|----|
| J84†  | Other interstitial pulmonary diseases                              | 35 | 21 |
| J840  | Alveolar and parietoalveolar conditions                            | 2  | 2  |
| J841  | Other interstitial pulmonary diseases with fibrosis                | 19 | 15 |
| J84.8 | Other specified interstitial pulmonary diseases                    | 0  | 0  |
| J849  | Interstitial pulmonary disease, unspecified                        | 1  | 0  |
| J99†  | Respiratory disorders in diseases classified elsewhere             | 2  | 2  |
| J991  | Respiratory disorders in other diffuse connective tissue disorders | 2  | 2  |
| M301  | Polyarteritis with lung involvement                                | 2  | 2  |
| M313  | Wegener granulomatosis                                             | 5  | 5  |

\*Including duplicates with the clinical source

† The umbrella code was used when no more precise codes were recorded in the SS database.

Abbreviations: ICDs: international classification of diseases; IDL: interstitial lung disease, SS: social security

**Table S3: Age and sex-standardized prevalence rates of the main etiological diagnoses (reviewed cases)**

| Sarcoidosis     |         |               |                     |       |             |                   |
|-----------------|---------|---------------|---------------------|-------|-------------|-------------------|
| Age             | Females | Total females | Females prevalence* | Males | Total males | Males prevalence* |
| 15-24           | 5       | 102440        | 4,9                 | 3     | 103051      | 2.9               |
| 25-34           | 33      | 121319        | 27,2                | 33    | 112285      | 29.4              |
| 35-44           | 47      | 110563        | 42,5                | 51    | 111619      | 45.7              |
| 45-54           | 49      | 101188        | 48,4                | 27    | 98602       | 27.4              |
| 55-64           | 24      | 82804         | 29,0                | 18    | 81156       | 22.2              |
| 65-74           | 11      | 44159         | 24,9                | 7     | 42028       | 16.7              |
| 75-84           | 2       | 36127         | 5,5                 | 1     | 24698       | 4.0               |
| > 84            | 2       | 16116         | 12,4                | 1     | 6129        | 16.3              |
| CTDs/Vasculitis |         |               |                     |       |             |                   |
| Age             | Females | Total females | Females prevalence* | Males | Total males | Males prevalence* |
| 15-24           | 0       | 102440        | 0                   | 0     | 103051      | 0                 |
| 25-34           | 7       | 121319        | 5,8                 | 2     | 112285      | 1.8               |
| 35-44           | 5       | 110563        | 4,5                 | 4     | 111619      | 3.6               |
| 45-54           | 25      | 101188        | 24,7                | 10    | 98602       | 10.1              |
| 55-64           | 20      | 82804         | 24,2                | 15    | 81156       | 18.5              |
| 65-74           | 24      | 44159         | 54,3                | 7     | 42028       | 16.7              |
| 75-84           | 17      | 36127         | 47,1                | 4     | 24698       | 16.2              |
| > 84            | 1       | 16116         | 6,2                 | 0     | 6129        | 0                 |
| IPF             |         |               |                     |       |             |                   |
| Age             | Females | Total females | Females prevalence* | Males | Total males | Males prevalence* |



**Table S4: Age and sex-standardized prevalence and incidence rates of the main etiological diagnoses (reviewed cases) of individuals with age of 65 and more.**

| Diagnoses       | Prevalent cases | Incident cases | Standardized Prevalence Rate (per 100.000) | Standardized Incidence Rate (per 100.000 per years) |
|-----------------|-----------------|----------------|--------------------------------------------|-----------------------------------------------------|
| Sarcoidosis     | 22              | 5              | 14.0                                       | 3.0                                                 |
| IPF             | 66              | 27             | 39.0                                       | 16.0                                                |
| CTDs/Vasculitis | 46              | 23             | 27.2                                       | 13.6                                                |
| All diseases    | 251             | 103            | 148.3                                      | 60.9                                                |

**Table S5: Description of prevalent ILD cases for the whole cohort (reviewed and non reviewed)**

| ILD cases                                   | All cases   | Overall prevalence (per 100.000) | Reviewed cases | Reviewed cases prevalence (per 100.000) |
|---------------------------------------------|-------------|----------------------------------|----------------|-----------------------------------------|
| <i>ILDs of known cause</i>                  | 353         | 29.55                            | 260            | 21.76                                   |
| CTDs/vasculitis                             | 157         | 13.14                            | 145            | 12.14                                   |
| Pneumoconioses                              | 119         | 9.96                             | 42             | 3.52                                    |
| Drug-induced ILD                            | 33          | 2.76                             | 31             | 2.60                                    |
| Hypersensitivity pneumonitis                | 28          | 2.34                             | 28             | 2.34                                    |
| Radiation induced pneumonitis               | 9           | 0.75                             | 7              | 0.59                                    |
| Others*                                     | 7           | 0.59                             | 7              | 0.59                                    |
| <i>Idiopathic interstitial pneumonias</i>   | 183         | 15.31                            | 145            | 12.14                                   |
| IPF                                         | 135         | 11.30                            | 98             | 8.20                                    |
| NSIP                                        | 20          | 1.67                             | 20             | 1.67                                    |
| Desquamative interstitial pneumonia         | 10          | 0.84                             | 10             | 0.84                                    |
| Organizing pneumonia                        | 9           | 0.75                             | 9              | 0.75                                    |
| Unclassified (despite SLB)                  | 6           | 0.50                             | 6              | 0.50                                    |
| Respiratory bronchiolitis with ILD          | 3           | 0.25                             | 2              | 0.17                                    |
| Lymphoid interstitial pneumonia             | 0           | 0.00                             | 0              | 0.00                                    |
| <i>Sarcoidosis</i>                          | 536         | 44.78                            | 361            | 30.22                                   |
| <i>Particular ILDs</i>                      | 22          | 1.84                             | 22             | 1.84                                    |
| Lymphangioleiomyomatosis                    | 9           | 0.75                             | 9              | 0.75                                    |
| Chronic idiopathic eosinophilic pneumonia   | 5           | 0.42                             | 5              | 0.42                                    |
| Pulmonary Langerhans Cell Histiocytosis     | 4           | 0.33                             | 4              | 0.33                                    |
| Pulmonary alveolar proteinosis              | 2           | 0.17                             | 2              | 0.17                                    |
| Others†                                     | 2           | 0.17                             | 2              | 0.17                                    |
| <i>Undetermined diagnosis</i>               | 76          | 6.36                             | 60             | 5.02                                    |
| Differential diagnosis between IPF and NSIP | 40          | 3.35                             | 34             | 2.85                                    |
| <b>All cases</b>                            | <b>1170</b> | <b>97.94</b>                     | <b>848</b>     | <b>70.99</b>                            |

Abbreviations: ILD: interstitial lung disease, CTDs: connective tissue disease, IPF: idiopathic pulmonary fibrosis, NSIP: non specific interstitial pneumonia, SLB: surgical lung biopsy.

\*Including chronic inflammatory colitis (n=4), amyloidosis (n=1), IgG4 syndrome (n=1), and progeria

(n=1).

†Including alveolar microlithiasis (n=1), Erdheim Chester's disease (n=1)

**Table S6: Geographical origin-standardized prevalence and incidence rates of the main etiological diagnoses (reviewed cases)**

|                               | Prevalence (per 100.000)<br>[95%CI] | Incidence (per 100.000 per years)<br>[95%CI] |
|-------------------------------|-------------------------------------|----------------------------------------------|
| <b><i>Sarcoidosis</i></b>     | <b>26.28 [23.46 - 29.36]</b>        | <b>4.70 [3.54 - 6.09]</b>                    |
| Europeans                     | 10.72 [8.66 - 13.12]                | 2.40 [1.48 - 3.66]                           |
| North-africans                | 60.02 [48.07 - 74.03]               | 9.66 [5.28 - 16.20]                          |
| Afro-caribbeans               | 112.74 [92.40 - 136.22]             | 16.86 [9.64 - 27.38]                         |
| Others                        | 33.31 [21.76 - 48.81]               | 6.41 [2.08 - 14.95]                          |
| <b><i>IPF</i></b>             | <b>7.95 [6.43 - 9.72]</b>           | <b>2.76 [1.90 - 3.88]</b>                    |
| Europeans                     | 5.82 [4.33 - 7.65]                  | 1.60 [0.87 - 2.68]                           |
| North-africans                | 26.90 [19.13 - 36.78]               | 11.73 [6.83 - 18.78]                         |
| Afro-caribbeans               | 4.21 [1.15 - 10.79]                 | 1.05 [0.027 - 5.87]                          |
| Others                        | 1.28 [0.03 - 7.14]                  | 1.28 [0.03 - 7.14]                           |
| <b><i>CTDs/vasculitis</i></b> | <b>11.80 [9.94 - 13.92]</b>         | <b>3.43 [2.46 - 4.66]</b>                    |
| Europeans                     | 5.70 [4.23 - 7.52]                  | 1.83 [1.04 - 2.96]                           |
| North-africans                | 26.90 [19.13 - 36.78]               | 12.42 [7.36 - 19.62]                         |
| Afro-caribbeans               | 41.09 [29.22 - 56.17]               | 4.21 [1.15 - 10.79]                          |
| Others                        | 16.66 [8.87 - 28.48]                | 3.84 [0.79 - 11.23]                          |
| <b><i>All Diseases</i></b>    | <b>65.71 [61.20 - 70.47]</b>        | <b>17.91 [15.59 - 20.48]</b>                 |
| Europeans                     | 37.30 [33.37 - 41.57]               | 11.75 [9.59 - 14.25]                         |
| North-africans                | 160.74 [140.77 - 182.73]            | 49.67 [38.87 - 62.55]                        |
| Afro-caribbeans               | 180.18 [154.20 - 209.27]            | 26.34 [ 17.05 - 38.88]                       |
| Others                        | 69.19 [51.98 - 90.27]               | 17.94 [9.81 - 30.10]                         |

Abbreviations: CI : confidence interval

**Figure S1: Distribution of prevalent ILD cases according to underlying etiological diagnoses for the whole cohort (reviewed and non reviewed cases)**
